# Supplementary material for: The Effect of Turbidity on the Behavior of Bleak (Alburnus alburnus)
Source: MDPI journal article supplement (doi:10.3390/fishes9010003), 2023-12-20
Supplement: s1 [file s1]

Archive with 1 entries (1 files):
- fishes-2739220-Supplementary.pdf
