# Supplementary figures and images for: The Effect of Turbidity on the Behavior of Bleak (Alburnus alburnus)
Source: MDPI journal article supplement (doi:10.3390/fishes9010003), 2023-12-20

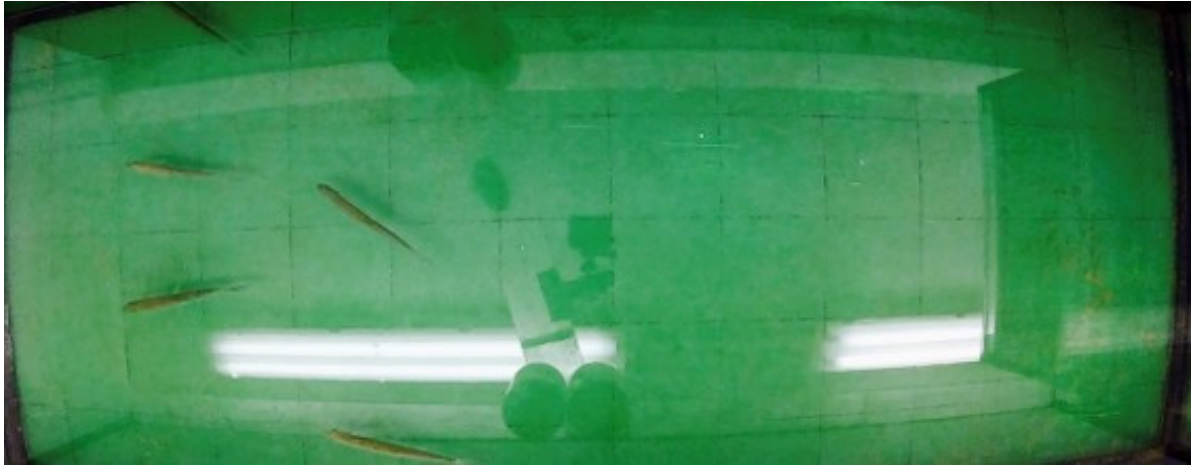

**Figure S1.** Photo of an experimental aquarium at 0 NTU turbidity level.

Supplement: s1 [file s1]
